# Supplementary material for: Beyond risk perception: Capability, opportunity, and motivation as determinants of heat- protective behaviour among urban residents
Source: Research Square preprint supplement (doi:10.21203/rs.3.rs-8435842/v1), 2026-01-23
Supplement: Supplementary file 1 [file 9cffd094ae764344e11242f8.docx]

**Table S1.** *Variables and Measurement Scales Used in Hierarchical Regression Analysis*

| **Variable** | **Item/Question** | **Response Scale** |
| --- | --- | --- |
| **DEPENDENT VARIABLE** |  |  |
| BehaviorSum | Sum of 7 heat-protective behaviors (Q1_1 to Q1_7): <br>  Thinking back to this summer's recent bout of extreme heat, how often have you taken the following measures? • Increase water/liquid consumption • Stay indoors during peak heat hours • Use fans • Use air conditioning • Seek cool public places • Modify daily routines • Check on vulnerable family/neighbors | Each item: 1 = Never to 5 = Always |
| **DEMOGRAPHICS (Model 1)** |  |  |
| Female | Q26: Gender | 1 = Male 2 = Female 3 = Other/Prefer not to say |
| Q27 (Age) | Q27: What is your age? | Continuous (years) |
| Q28 (Education) | Q28: Highest level of education completed | 1 = Primary/Secondary 2 = High school/Vocational 3 = University |
| Q30 (Economic) | Q30: How do you perceive your current economic situation? | 1 = Very difficult 2 = Difficult 3 = Neither easy nor difficult 4 = Easy 5 = Very easy |
| HousingOwned | Q29: Housing tenure | 1 = Owned 2 = Rented 3 = Other arrangements |
| **HEALTH (Model 2)** |  |  |
| HealthVuln | Q2_1 to Q2_5: Do you have any of the following chronic conditions? • Heart disease (Q2_1) • Diabetes (Q2_2) • Chronic respiratory disease (Q2_3) • Kidney problems (Q2_4) • Obesity (Q2_5) | Each item: 0 = No, 1 = Yes |
| **CAPABILITY - Psychological (Model 3)** |  |  |
| Q6 | Q6: I feel confident in my ability to recognize when temperatures are dangerously high | 1 = Strongly disagree to 5 = Strongly agree |
| Q7 | Q7: I know what measures I should take to protect myself from extreme heat | 1 = Strongly disagree to 5 = Strongly agree |
| **CAPABILITY - Physical (Model 3)** |  |  |
| Q3_1 (AC) | Q3_1: Do you have air conditioning at home? | 0 = No, 1 = Yes |
| Q3_2 (Fan) | Q3_2: Do you have fans at home? | 0 = No, 1 = Yes |
| Q3_3 (Blinds) | Q3_3: Do you have blinds or curtains at home? | 0 = No, 1 = Yes |
| Q3_4 (Ventilation) | Q3_4: Do you have cross-ventilation capabilities at home? | 0 = No, 1 = Yes |
| Q4 | Q4: How effective do you think the cooling methods you have at home are? | 1 = Not at all effective to 5 = Very effective |
| **OPPORTUNITY - Physical (Model 4)** |  |  |
| Q17 | Q17: My housing is conducive to protecting myself from extreme heat | 1 = Strongly disagree to 5 = Strongly agree |
| Q18 | Q18: The characteristics of my building help me stay cool during heat waves | 1 = Strongly disagree to 5 = Strongly agree |
| Q19 | Q19: There are cool, accessible spaces in my neighborhood where I can go during extreme heat | 1 = Strongly disagree to 5 = Strongly agree |
| **OPPORTUNITY - Social (Model 4)** |  |  |
| Q20 | Q20: People I know think that protecting oneself from heat is unnecessary | 1 = Strongly disagree to 5 = Strongly agree |
| Q21 | Q21: The quality of official information about heat protection is good | 1 = Strongly disagree to 5 = Strongly agree |
| Q22 | Q22: There is adequate institutional support for vulnerable people during heat waves | 1 = Strongly disagree to 5 = Strongly agree |
| Q23 | Q23: I can count on my social network for support during extreme heat episodes | 1 = Strongly disagree to 5 = Strongly agree |
| **MOTIVATION - Automatic (Model 5)** |  |  |
| Q8 | Q8: I feel personally vulnerable to the negative effects of extreme heat | 1 = Strongly disagree to 5 = Strongly agree |
| Q9 | Q9: I am worried about future heat waves | 1 = Strongly disagree to 5 = Strongly agree |
| **MOTIVATION - Reflective (Model 5)** |  |  |
| Q10 | Q10: I believe heat waves can have serious health consequences | 1 = Strongly disagree to 5 = Strongly agree |
| Q12 | Q12: I am capable of effectively protecting myself from extreme heat | 1 = Strongly disagree to 5 = Strongly agree |
| Q13_1 | Q13_1: Protecting myself from heat is... [Useless - Useful] | 1 = Useless to 7 = Useful |
| Q13_2 | Q13_2: Protecting myself from heat is... [Harmful - Beneficial] | 1 = Harmful to 7 = Beneficial |
| Q13_3 | Q13_3: Protecting myself from heat is... [Unpleasant - Pleasant] | 1 = Unpleasant to 7 = Pleasant |
| Q14 | Q14: Protecting oneself from heat is the government's responsibility, not individuals' | 1 = Strongly disagree to 5 = Strongly agree |
| Q15 | Q15: I intend to protect myself and my family during future heat waves | 1 = Strongly disagree to 5 = Strongly agree |

*Note: All analyses used listwise deletion for missing data. Q5 (economic capacity to use air conditioning) was excluded from the analysis as it only applied to participants who owned air conditioning, and its inclusion would have reduced the sample size by 24%.*

**Table S2.** *Regression coefficients for final model predicting heat-protective behavior (N = 1,508)*

| **Predictor** | **B** | **SE** | **t** | **p** | **95% CI** |
| --- | --- | --- | --- | --- | --- |
| *Demographics* |  |  |  |  |  |
| Female (vs. Male) | 0.536 | 0.189 | 2.843 | .005 | [0.166, 0.907] |
| Age | -0.031 | 0.007 | -4.482 | < .001 | [-0.045, -0.018] |
| Education | 0.090 | 0.143 | 0.629 | .529 | [-0.191, 0.371] |
| Economic situation | -0.005 | 0.008 | -0.607 | .544 | [-0.021, 0.011] |
| Housing owned | 0.355 | 0.202 | 1.757 | .079 | [-0.041, 0.750] |
| *Health* |  |  |  |  |  |
| Health vulnerability | 0.272 | 0.224 | 1.211 | .226 | [-0.169, 0.712] |
| *Capability - Psychological* |  |  |  |  |  |
| Confidence recognizing temps | 0.218 | 0.131 | 1.665 | .096 | [-0.039, 0.474] |
| Knowledge | -0.035 | 0.146 | -0.240 | .810 | [-0.321, 0.251] |
| *Capability - Physical* |  |  |  |  |  |
| AC availability | -1.288 | 0.234 | -5.509 | < .001 | [-1.747, -0.829] |
| Fan availability | -1.860 | 0.286 | -6.512 | < .001 | [-2.421, -1.300] |
| Blinds availability | 0.364 | 0.250 | 1.457 | .145 | [-0.126, 0.853] |
| Ventilation | -0.163 | 0.199 | -0.821 | .412 | [-0.553, 0.227] |
| Effectiveness of cooling | 0.309 | 0.136 | 2.272 | .023 | [0.042, 0.575] |
| *Opportunity - Physical* |  |  |  |  |  |
| Housing conducive | 0.014 | 0.121 | 0.112 | .910 | [-0.224, 0.252] |
| Building characteristics | 0.040 | 0.101 | 0.401 | .689 | [-0.157, 0.238] |
| Cool spaces | 0.105 | 0.090 | 1.173 | .241 | [-0.071, 0.281] |
| *Opportunity - Social* |  |  |  |  |  |
| Social norms | -0.040 | 0.094 | -0.421 | .674 | [-0.224, 0.145] |
| Quality of information | 0.117 | 0.109 | 1.071 | .284 | [-0.097, 0.330] |
| Institutional support | 0.135 | 0.104 | 1.300 | .194 | [-0.069, 0.340] |
| Social support | 0.449 | 0.118 | 3.813 | < .001 | [0.218, 0.680] |
| *Motivation - Automatic* |  |  |  |  |  |
| Perceived vulnerability | 0.080 | 0.094 | 0.849 | .396 | [-0.104, 0.264] |
| Worry about heat waves | 0.560 | 0.099 | 5.638 | < .001 | [0.365, 0.755] |
| *Motivation - Reflective* |  |  |  |  |  |
| Perceived severity | 0.563 | 0.110 | 5.111 | < .001 | [0.347, 0.779] |
| Self-efficacy | -0.109 | 0.135 | -0.806 | .420 | [-0.373, 0.156] |
| Attitude: useless-useful | 0.351 | 0.102 | 3.431 | < .001 | [0.150, 0.551] |
| Attitude: harmful-beneficial | 0.152 | 0.090 | 1.695 | .090 | [-0.024, 0.329] |
| Attitude: unpleasant-pleasant | 0.029 | 0.066 | 0.443 | .658 | [-0.100, 0.158] |
| Responsibility attribution | 0.089 | 0.091 | 0.979 | .328 | [-0.089, 0.268] |
| Intention | 0.654 | 0.141 | 4.642 | < .001 | [0.378, 0.930] |

*Note: Model R² = .282, F(28, 1479) = 20.72, p < .001.*

*Constant = 14.916 (SE = 1.296)*
